## Response to Letter: "Pediatric Obesity—Assessment, Treatment, and Prevention: An Endocrine Society Clinical Practice Guideline"

Dennis M. Styne,<sup>1</sup> Silva A. Arslanian,<sup>2</sup> Ellen L. Connor,<sup>3</sup> Ismaa Sadaf Farooqi,<sup>4</sup> M. Hassan Murad,<sup>5</sup> Janet H. Silverstein,<sup>6</sup> and Jack A. Yanovski<sup>7</sup>

<sup>1</sup>Department of Pediatrics, Endocrinology Section, University of California Davis, Sacramento, California 95817; <sup>2</sup>Division of Pediatric Endocrinology, Metabolism & Diabetes Mellitus, Children's Hospital of Pittsburgh, University of Pittsburgh, Pittsburgh, Pennsylvania 15224; <sup>3</sup>Division of Pediatric Endocrinology and Diabetes, Adolescent PCOS Clinic, American Family Children's Hospital, University of Wisconsin, Madison, Wisconsin 53792; <sup>4</sup>Metabolic Research Laboratories, University of Cambridge, Cambridge CB2 0QQ, United Kingdom; <sup>5</sup>Gonda Vascular Center and Division of Preventive, Occupational and Aerospace Medicine, Mayo Clinic, Rochester, Minnesota 55905; <sup>6</sup>Division of Endocrinology, University of Florida, Gainesville, Florida 32607; and <sup>7</sup>Section on Growth and Obesity, Eunice Kennedy Shriver National Institute of Child Health and Human Development, National Institutes of Health, Bethesda, Maryland 20892

**W**e thank the authors of this letter to the editor for their positive comments about our guidelines and the important points they have raised. They refer to the poor record of enrollment in treatment programs of families and children affected by pediatric obesity and to similarly disheartening statistics on the attrition of those who actually make it to the enrollment stage. These two factors highlight the difficulty of successful treatment of pediatric obesity once developed and led us to emphasize the primary importance of prevention of obesity. The infrastructure in which a child lives affects a family's ability to purchase the fruits and vegetables that we recommend and determines whether a child can safely achieve adequate moderate to vigorous physical activity during his or her play activities, which we endorse. Although clinicians can diagnose overweight and obesity, screen for comorbidities, and offer support and a range of measures to address problems within the confines of a clinical office, the child's environment is the proximal driver of the development of obesity in most individuals. Providers of child health must support community-wide efforts to establish healthy environments to most effectively address the etiology of childhood obesity. The valuable points that the authors of this letter raised dovetail into the unmet needs we proposed in our closing section: Continued investigations into the most effective methods of preventing and treating obesity and into

methods for changing environmental and economic factors that will lead to worldwide cultural changes in diet and activity should be priorities.

### Acknowledgments

Financial Disclosures of the Task Force\*: D.M.S. (Chair)—Financial and Business/Organizational Interests: Zafgen [Biomedical Research; Investigator (grant)]; Significant Financial Interest or Leadership Position: Teva, Bristol-Myers, Organovo (Ownership Interests). S.A.A.—Financial and Business/Organizational Interests: Aegerion (Consultant), Boehringer Ingelheim (Advisory Board and Data Safety Monitoring), Bristol-Myers Squibb (Advisory Board), INTARCIA Therapeutics, Inc. (Consultant), Lilly USA, LLC (Advisory Board), Novo Nordisk (Advisory Board), Ranbaxy (Consultant), Sanofi-aventis (Advisory Board), Janssen Pharmaceutical (Principal Investigator), NIH (Grantee and Reviewer); Significant Financial Interest or Leadership Position: Aegerion (Consultant), Boehringer Ingelheim (Advisory Board & Data Safety Monitoring), Bristol-Myers Squibb (Advisory Board), INTARCIA Therapeutics, Inc. (Consultant), Lilly USA, LLC (Advisory Board), Novo Nordisk (Advisory Board), Ranbaxy (Consultant), Sanofi-aventis (Advisory Board), Janssen Pharmaceutical (Principal Investigator), NIH (Grantee and Reviewer). E.L.C.—Financial and Business/Organizational Interests: Pediatric Endocrine Society (Obesity Committee Chair); Significant Financial Interest or Leadership Position: none declared. I.S.F.—Financial and Business/Organizational

Interests: none declared; Significant Financial Interest or Leadership Position: none declared. M.H.M.<sup>†</sup>—Financial and Business/Organizational Interests: Mayo Clinic, Evidence-Based Practice Center; Significant Financial Interest or Leadership Position: none declared. J.H.S.—Financial and Business/Organizational Interests: Pediatric Endocrine Society (Chair, MOC Committee; Member, SCAMPS Committee), Daiichi Sankyo [Clinical Trial (funds to UF)], Sanofi [Clinical Trial (funds to UF)]; Significant Financial Interest or Leadership Position: Daiichi Sankyo [Clinical Trial (funds to UF)], Sanofi (Clinical Trial to UF). J.A.Y.—Financial and

Business/Organizational Interests: Zafgen Inc. [Principal Investigator (funds to NIH)]; Significant Financial Interest or Leadership Position: Zafgen Inc. [Principal Investigator (funds to NIH)].

\*Financial, business, and organizational disclosures of the Task Force cover the year before publication. Disclosures before this time period are archived.

<sup>†</sup>Evidence-based reviews for this guideline were prepared by the Mayo Clinic, Evidence-based Practice Center, under contract with the Endocrine Society.
